# Supplementary material for: Study of Malformin C, a Fungal Source Cyclic Pentapeptide, as an Anti-Cancer Drug
Source: PubMed Central journal article supplement (PMC4635020; doi:10.1371/journal.pone.0140069), 2015-11-05
Supplement: pone.0140069.s008.pdf [file pone.0140069.s008.pdf]

**Supplementary Table 1 Growth inhibition of Malformin C for different cell lines**

| Cell Lines               | IC <sub>50</sub> (μM) <sup>a</sup> |           |           |           |             |
|--------------------------|------------------------------------|-----------|-----------|-----------|-------------|
|                          | Colon 38                           | HCT 116   | PanO2     | H1975     | CEM         |
| Malformin C <sup>b</sup> | 0.27±0.07                          | 0.18±0.02 | 0.29±0.05 | 0.16±0.04 | 0.030±0.008 |
| L-OddC                   | 1.1±0.08                           | 0.88±0.1  | 5.2±0.7   | 0.34±0.04 | 0.026±0.003 |

<sup>a</sup> Values were means ± SD from more than three independent experiments, with each data point done in duplicate, and all the cells were exposed to different drugs for three generations.

<sup>b</sup> There was significant difference of Malformin C's IC<sub>50</sub> among different cell lines according to one-way ANOVA statistical analysis ( $P<0.01$ ); and the IC<sub>50</sub> of Malformin C was significantly different from that of L-OddC in Colon 38 cells, HCT 116 cells and PanO2 cells ( $P<0.01$ ) by two-sided t test.
